# Supplementary material for: Radioimmune Imaging of α4β7 Integrin and TNFα for Diagnostic and Therapeutic Applications in Inflammatory Bowel Disease
Source: MDPI journal article supplement (doi:10.3390/pharmaceutics15030817), 2023-03-02

## Supplementary data

**Table S1:** Biodistribution of radiolabelled mAbs in mice. Data are shown as mean %ID/g±SD.

|              | Anti-TNF $\alpha$ (CTRL mice) |      |       |      | Anti-integrin (CTRL mice) |       |        |       | Control isotype (CTRL mice) |      |       |      |
|--------------|-------------------------------|------|-------|------|---------------------------|-------|--------|-------|-----------------------------|------|-------|------|
|              | 6 h                           |      | 24 h  |      | 6 h                       |       | 24 h   |       | 6 h                         |      | 24 h  |      |
|              | %ID/g                         | SD   | %ID/g | SD   | %ID/g                     | SD    | %ID/g  | SD    | %ID/g                       | SD   | %ID/g | SD   |
| Blood        | 9.15                          | 1.10 | 2.89  | 1.02 | 62.86                     | 10.45 | 27.89  | 6.54  | 30.22                       | 3.59 | 18.85 | 1.28 |
| Colon (ATDR) | 1.58                          | 0.35 | 0.97  | 0.38 | 10.41                     | 4.62  | 12.67  | 4.90  | 3.33                        | 0.69 | 3.68  | 0.30 |
| Small Bowel  | 2.03                          | 0.14 | 1.52  | 1.41 | 32.23                     | 1.79  | 23.44  | 8.89  | 5.34                        | 0.26 | 4.76  | 0.56 |
| Kidneys      | 8.83                          | 2.36 | 7.50  | 4.50 | 27.98                     | 3.10  | 16.50  | 0.14  | 16.68                       | 2.71 | 13.27 | 0.91 |
| Spleen       | 24.54                         | 9.02 | 17.09 | 5.82 | 267.41                    | 39.83 | 172.11 | 83.22 | 22.14                       | 2.04 | 19.91 | 2.88 |
| Stomach      | 4.03                          | 0.48 | 2.67  | 1.37 | 8.72                      | 2.46  | 4.16   | 0.72  | 5.98                        | 1.79 | 3.13  | 0.80 |
| Liver        | 34.97                         | 6.84 | 21.92 | 9.36 | 47.16                     | 5.44  | 41.76  | 31.65 | 22.72                       | 1.66 | 20.34 | 1.20 |
| Muscle       | 0.75                          | 0.33 | 0.27  | 0.10 | 3.35                      | 1.14  | 2.69   | 0.81  | 1.43                        | 0.02 | 2.00  | 0.18 |
| Bone         | 4.12                          | 1.09 | 2.43  | 0.81 | 40.75                     | 10.97 | 21.69  | 8.92  | 4.73                        | 0.57 | 4.65  | 1.07 |
| Lungs        | 3.76                          | 0.33 | 1.41  | 0.30 | 36.59                     | 3.24  | 16.25  | 1.26  | 11.63                       | 2.98 | 9.05  | 1.88 |
| Heart        | 2.47                          | 0.32 | 0.93  | 0.30 | 14.86                     | 1.80  | 7.64   | 1.44  | 8.77                        | 0.64 | 6.79  | 0.97 |

  

|              | Anti-TNF $\alpha$ (DSS mice) |      |       |      | Anti-integrin (DSS mice) |       |       |       | Control isotype (DSS mice) |      |       |       |
|--------------|------------------------------|------|-------|------|--------------------------|-------|-------|-------|----------------------------|------|-------|-------|
|              | 6 h                          |      | 24 h  |      | 6 h                      |       | 24 h  |       | 6 h                        |      | 24 h  |       |
|              | %ID/g                        | SD   | %ID/g | SD   | %ID/g                    | SD    | %ID/g | SD    | %ID/g                      | SD   | %ID/g | SD    |
| Blood        | 9.64                         | 0.19 | 2.97  | 0.36 | 61.51                    | 11.92 | 25.13 | 14.95 | 32.19                      | 5.21 | 13.55 | 9.83  |
| Colon (ATDR) | 2.39                         | 0.66 | 1.55  | 0.88 | 18.32                    | 13.06 | 22.41 | 8.91  | 5.62                       | 1.14 | 10.97 | 4.06  |
| Small Bowel  | 2.23                         | 0.42 | 0.89  | 0.05 | 19.44                    | 8.79  | 21.04 | 5.75  | 4.71                       | 0.47 | 4.24  | 3.99  |
| Kidneys      | 6.15                         | 4.86 | 5.10  | 0.05 | 48.93                    | 20.41 | 20.94 | 3.99  | 18.15                      | 2.97 | 9.36  | 7.77  |
| Spleen       | 29.26                        | 1.01 | 18.50 | 5.30 | 76.13                    | 81.43 | 77.22 | 8.48  | 27.46                      | 7.23 | 13.80 | 10.64 |
| Stomach      | 6.15                         | 1.12 | 3.52  | 2.44 | 12.81                    | 8.32  | 11.51 | 7.74  | 7.16                       | 3.55 | 8.68  | 2.41  |
| Liver        | 40.35                        | 2.08 | 26.37 | 3.99 | 43.20                    | 10.56 | 40.32 | 4.66  | 24.42                      | 3.86 | 15.25 | 13.17 |
| Muscle       | 0.90                         | 0.02 | 0.26  | 0.07 | 3.34                     | 0.80  | 2.39  | 0.13  | 1.67                       | 0.19 | 0.63  | 0.55  |
| Bone         | 3.54                         | 0.19 | 1.94  | 0.57 | 32.76                    | 16.54 | 32.41 | 4.38  | 6.41                       | 3.38 | 3.08  | 2.15  |
| Lungs        | 3.72                         | 0.37 | 1.38  | 0.07 | 53.53                    | 33.09 | 22.57 | 3.88  | 11.04                      | 1.04 | 7.09  | 1.10  |
| Heart        | 2.87                         | 0.46 | 0.86  | 0.06 | 23.05                    | 15.93 | 9.07  | 2.07  | 8.90                       | 4.46 | 4.61  | 3.80  |

%ID/g = percentage of Injected Dose per gram of tissue; SD = Standard Deviation; CTRL = Control; DSS = Dextran Sulfate Sodium; ATDR = Ascending, Transvers, Descending, Recto-sigmoidal colon.

**Figure S1:** Left: correlation between immunohistochemistry staining for  $\alpha_4\beta_7$  integrin (mean score of 5 rings from each block) and radioactivity counted in each block (expressed as %ID) of a DSS-mouse injected with  $^{99m}\text{Tc}$ -anti- $\alpha_4\beta_7$  integrin mAb, 24h before. A correlation was found between the two parameters highlighting the specificity of  $^{99m}\text{Tc}$ -anti- $\alpha_4\beta_7$  integrin mAb to  $\alpha_4\beta_7$  integrin in tissue. Right: the figure shows the large bowel with superimposed the gamma-camera image of it. Ascending colon, transvers colon, descending colon, sigma-rectum, were each cut in 4 blocks and counted for radioactivity. Then, each block was cut in 5 rings and stained for immunohistochemistry. Black values correspond to counts in each block. Values in green represents the mean score of  $\alpha_4\beta_7$  integrin expression in 5 rings of the same block.

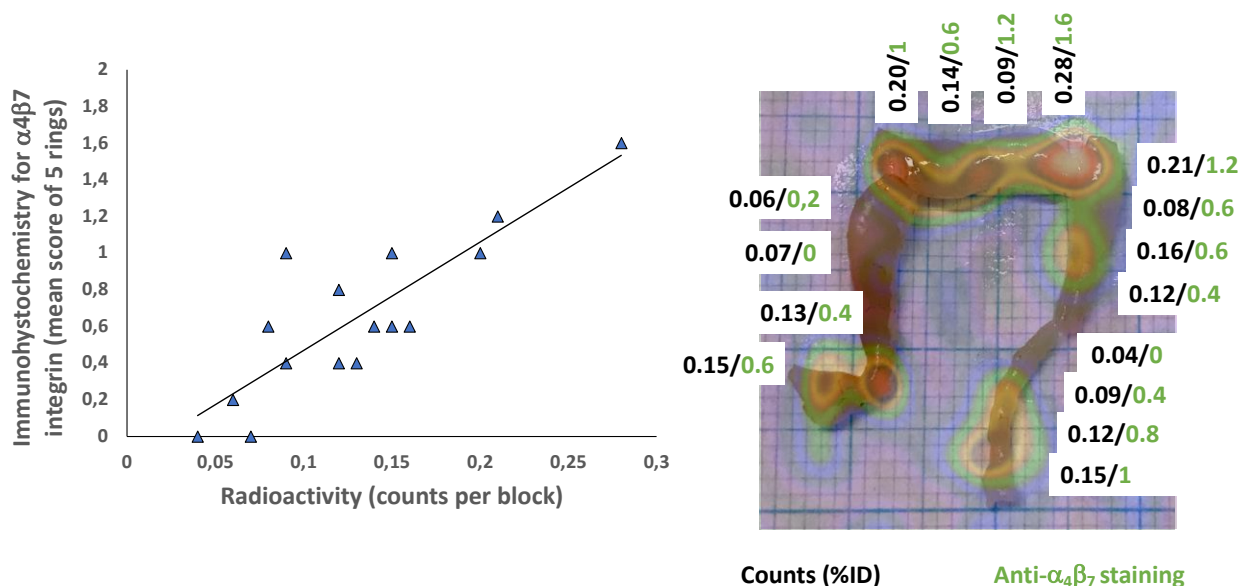

**Figure S2:** Left: correlation between immunohistochemistry staining for TNF $\alpha$  (mean score of 5 rings from each block) and radioactivity counted in each block (expressed as %ID) of a DSS-mouse injected with  $^{99m}\text{Tc}$ -anti-TNF $\alpha$  mAb, 24h before. A correlation was found between the two parameters highlighting the specificity of  $^{99m}\text{Tc}$ -anti-TNF $\alpha$  mAb to TNF $\alpha$  in tissue. Right: the figure shows the large bowel with superimposed the gamma-camera image of it. Ascending colon, transvers colon, descending colon, sigma-rectum, were each cut in 4 blocks and counted for radioactivity. Then, each block was cut in 5 rings and stained for immunohistochemistry. Black values correspond to counts in each block. Values in red represents the mean score of TNF $\alpha$  expression in 5 rings of the same block.

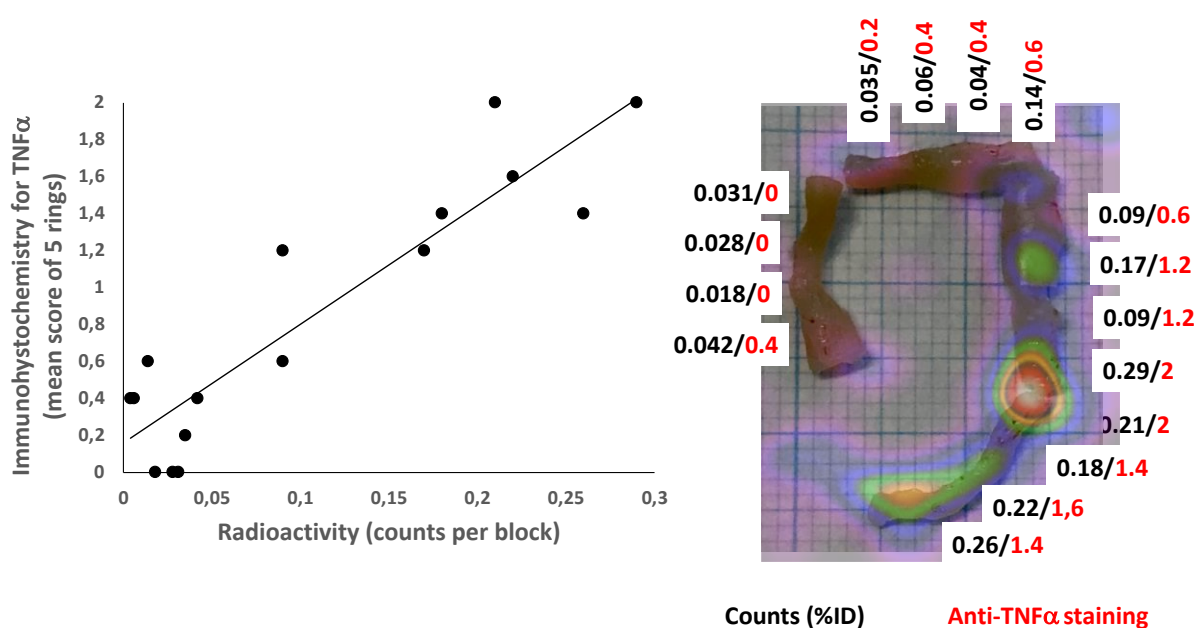

**Figure S3:** Left: correlation between immunohistochemistry staining for  $\alpha_4\beta_7$  integrin (circles) and for TNF $\alpha$  (triangles), (mean score of 5 rings from each block) and radioactivity counted in each block (expressed as %ID) of a DSS-mouse injected with  $^{99m}\text{Tc}$ -anti-IgG $_{2a}$  mAb, 24h before. No correlation was found between the two parameters (dotted lines) highlighting that the accumulation of  $^{99m}\text{Tc}$ -anti-IgG $_{2a}$  mAb is not related to presence of  $\alpha_4\beta_7$  integrin or TNF $\alpha$  in tissue. Right: the figure shows the large bowel with superimposed the gamma-camera image of it. Ascending colon, transvers colon, descending colon, sigma-rectum, were each cut in 4 blocks and counted for radioactivity. Then, each block was cut in 5 rings and stained for immunohistochemistry. Black values correspond to counts in each block. Values in green represents the mean score of  $\alpha_4\beta_7$  integrin expression in 5 rings of the sand values in red represents the mean score of TNF $\alpha$  expression.

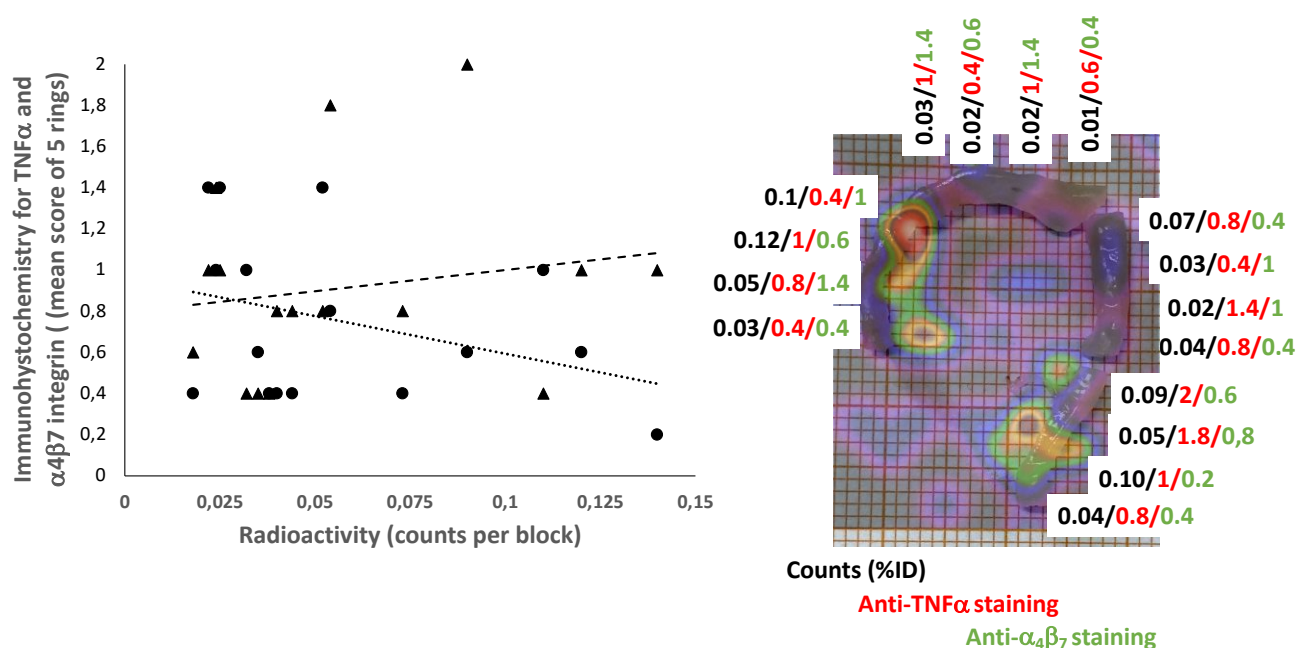

Supplement: s1 [file s1]
